# Supplementary material
Source: Springer Nature journal article supplement (https://www.springermedizin.de/resource/supplementary/13075_2004_1655_MOESM7_ESM.pdf/9690272)

CD27

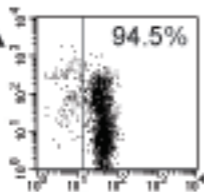

con

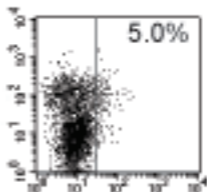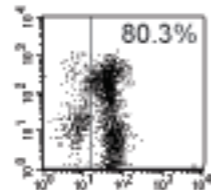

RA

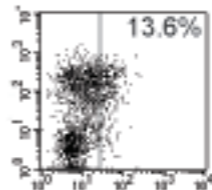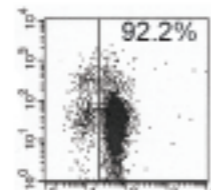

SLE

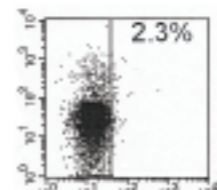

CXCR5

CXCR3

Supplement: MOESM7 [file 9690272]
